# Supplementary material
Source: MDPI journal article supplement (https://www.mdpi.com/2673-4117/4/4/162)
Supplement: s1 [file s1]

|    |                              |         |           |
|----|------------------------------|---------|-----------|
| P1 | 3 - Layout Walls             | 5 days  | 8900 USD  |
|    | 4 - Frame All Interior Walls | 20 days | 42400 USD |

| Part I: Risk identification |                    |                    |
|-----------------------------|--------------------|--------------------|
| 25% of overlapping          | 50% of overlapping | 75% of overlapping |
| R1:                         | R1:                | R1:                |
| R2:                         | R2:                | R2:                |
| R3:                         | R3:                | R3:                |

|    |                              |         |           |
|----|------------------------------|---------|-----------|
| P1 | 3 - Layout Walls             | 5 days  | 8900 USD  |
|    | 4 - Frame All Interior Walls | 20 days | 42400 USD |

| Part IV: Risk Response/Strategy |  |
|---------------------------------|--|
| 25% of overlapping              |  |

|                        |
|------------------------|
| R1 - Response 1 (RE1): |
| R1 - Response 2 (RE2): |
| R2 - Response 1 (RE1): |
| R2 - Response 2 (RE2): |
| R3 - Response 1 (RE1): |
| R3 - Response 2 (RE2): |

|    |                              |         |           |
|----|------------------------------|---------|-----------|
| P1 | 3 - Layout Walls             | 5 days  | 8900 USD  |
|    | 4 - Frame All Interior Walls | 20 days | 42400 USD |

| Part IV: Risk Response/Strategy |  |
|---------------------------------|--|
| 50% of overlapping              |  |

|                        |
|------------------------|
| R1 - Response 1 (RE1): |
| R1 - Response 2 (RE2): |
| R2 - Response 1 (RE1): |
| R2 - Response 2 (RE2): |
| R3 - Response 1 (RE1): |
| R3 - Response 2 (RE2): |

|    |                              |         |           |
|----|------------------------------|---------|-----------|
| P1 | 3 - Layout Walls             | 5 days  | 8900 USD  |
|    | 4 - Frame All Interior Walls | 20 days | 42400 USD |

| Part IV: Risk Response/Strategy |  |
|---------------------------------|--|
| 75% of overlapping              |  |

|                        |
|------------------------|
| R1 - Response 1 (RE1): |
| R1 - Response 2 (RE2): |
| R2 - Response 1 (RE1): |
| R2 - Response 2 (RE2): |
| R3 - Response 1 (RE1): |
| R3 - Response 2 (RE2): |
